# Supplementary material for: How much sugar is hidden in drinks marketed to children? A survey of fruit juices, juice drinks and smoothies
Source: PubMed Central journal article supplement (PMC4809069; doi:10.1136/bmjopen-2015-010330), 2016-03-21
Supplement: bmjopen-2015-010330supp_appendix2.pdf [file bmjopen-2015-010330supp_appendix2.pdf]

## APPENDIX 2 – FULL RESULTS

Data table sorted by category, alphabetically, highest sugars (g) per 100ml. Product information was collected online, instore or direct from manufacturers.

Colour coding based on new front of pack colour-coded nutrition labelling criteria.

Sugars - Red >13.5g/portion or >11.25g/100ml, Amber >2.5≤11.25/100ml, Green ≤2.25g/100ml

Serving size has been standardised to 200ml, the standard portion size given on 46% of packs. Although many varieties are available in a 200ml carton size, serving size ranged from 85-500ml and have been recalculated as 200ml for comparison purposes.

| Product Name                                                                 | Portion size | Sugars (g) per 100ml | Sugars (g) per 200ml serving* | Teaspoons sugar (g) equiv/ 200ml serving* |
|------------------------------------------------------------------------------|--------------|----------------------|-------------------------------|-------------------------------------------|
| <b>Fruit Juice</b>                                                           |              |                      |                               |                                           |
| Asda Chosen by Kids Tropical Juice From Concentrate 4 x180ml                 | 180          | 13.0                 | 26.0                          | 7                                         |
| Morrisons Pineapple Juice From Concentrate 3 x 200ml                         | 200          | 12.6                 | 25.2                          | 6                                         |
| Eager Cloudy Pressed Apple & Mango Juice 4 x 180ml                           | 180          | 12.0                 | 24.0                          | 6                                         |
| Essential Waitrose Pure Pineapple Juice From Concentrate 4 x 200ml           | 200          | 11.9                 | 23.8                          | 6                                         |
| Eager 100% Cloudy Pressed Pineapple Juice 4 x 180ml                          | 180          | 11.5                 | 23.0                          | 6                                         |
| Morrisons Apple Juice From Concentrate 3 x 200ml                             | 200          | 11.4                 | 22.8                          | 6                                         |
| Calypso 12 Juice Shots 100% Pure Apple Juice From Concentrate 12 x 85ml      | 85           | 11.4                 | 22.8                          | 6                                         |
| Essential Waitrose Pure Apple Juice From concentrate 3 x 200ml               | 200          | 11.2                 | 22.4                          | 6                                         |
| Jucee 100% Pure Pineapple Juice From Concentrate 6 x 200ml                   | 200          | 11.0                 | 22.0                          | 6                                         |
| The Co-operative Loved By Us Pure Pineapple Juice From Concentrate 3 x 200ml | 200          | 11.0                 | 22.0                          | 6                                         |
| Jucee 100% Pure Apple Juice From Concentrate 6 x 200ml                       | 200          | 10.4                 | 20.8                          | 5                                         |

|                                                                              |     |         |      |   |
|------------------------------------------------------------------------------|-----|---------|------|---|
| Jucee 100% Pure Cherries & Berries 6 x 200ml                                 | 200 | 10.4    | 20.8 | 5 |
| Morrisons Orange Juice from Concentrate 3 x 200ml                            | 200 | 10.4    | 20.8 | 5 |
| Sainsbury's Smooth Orange Juice from Concentrate 3 x 200ml                   | 200 | 10.4    | 20.8 | 5 |
| The Co-operative Pure Apple Juice from Concentrate 3 x 200ml                 | 200 | 10.4    | 20.8 | 5 |
| Copella English Apple 330ml                                                  | 330 | 10.3    | 20.6 | 5 |
| Essential Waitrose Pure Orange Juice From Concentrate 6 x 200ml              | 200 | 10.2    | 20.4 | 5 |
| Jucee 100% Pure Orange Juice From Concentrate 6 x 200ml                      | 200 | 9.2     | 18.4 | 5 |
| The Co-operative Loved By Us Pure Orange Juice From Concentrate 3 x 200ml    | 200 | 9.2     | 18.4 | 5 |
| Innocent 100% Tropical Juice for Kids 4x180ml                                | 180 | 8.9     | 17.8 | 4 |
| Innocent 100% Apple Juice for Kids 4 x 180ml                                 | 180 | 7.8     | 15.6 | 4 |
|                                                                              |     | average | 21.4 | 5 |
| <b>Juice Drinks</b>                                                          |     |         |      |   |
| Rubicon Lychee Exotic Juice Drink 288ml                                      | 288 | 13.3    | 26.6 | 7 |
| Rubicon Passion Exotic Juice Drink 288ml                                     | 288 | 13.1    | 26.2 | 7 |
| Aasani Passion Fruit 250ml                                                   | 250 | 12.8    | 25.6 | 6 |
| SunStream Splash Mango Juice Drink 10 x 200ml                                | 200 | 12.7    | 25.4 | 6 |
| Rubicon Mango Exotic Juice Drink 288ml                                       | 500 | 12.6    | 25.2 | 6 |
| Rubicon Guava Exotic Juice Drink 288ml                                       | 288 | 12.6    | 25.2 | 6 |
| Aasani Tropical Juice Drink 250ml                                            | 250 | 12.5    | 25.0 | 6 |
| Tesco Blackcurrant Pouch Juice Drink 10X200ml                                | 200 | 12.5    | 25.0 | 6 |
| Capri-Sun Blackcurrant Juice Drink                                           | 200 | 12.2    | 24.0 | 6 |
| Sainsbury's Fruit Slurps Blackcurrant & Apple Juice Drink pouches 10 x 200ml | 200 | 11.7    | 23.4 | 6 |
| Ocean Spray Cranberry &R/Berry Juice Drink 3X200ml                           | 200 | 11.6    | 23.2 | 6 |
| SunStream Splash Lychee Juice Drink 10 x 200ml                               | 200 | 11.6    | 23.2 | 6 |
| Rubicon Pomegranate Exotic Juice Drink 288ml                                 | 288 | 11.3    | 22.6 | 6 |
| Sainsbury's Apple Juice from Concentrate 3 x 200ml                           | 200 | 11.3    | 22.6 | 6 |
| Rubicon Papaya Exotic Juice Drink 288ml                                      | 288 | 11.1    | 22.2 | 6 |
| Capri-Sun Orange & Tropical 330ml                                            | 330 | 11.0    | 22.0 | 6 |
| Robinsons Fruit Shoot Apple & Blackcurrant 275ml                             | 275 | 11.0    | 22.0 | 6 |

|                                                                       |     |      |      |   |
|-----------------------------------------------------------------------|-----|------|------|---|
| Ocean Spray Cranberry Classic 3 X 200ml                               | 200 | 11.0 | 22.0 | 6 |
| SunStream Splash Tropical Juice Drink 200ml                           | 200 | 11.0 | 22.0 | 6 |
| Tesco Fruit Splash Apple Juice Drink 10X200ml                         | 200 | 11.0 | 22.0 | 6 |
| Ribena Strawberry 10 x 200ml                                          | 200 | 10.9 | 21.8 | 5 |
| Sainsbury's Fruit Slurps Orange Juice Drink pouches 10 x 200ml        | 200 | 10.9 | 21.8 | 5 |
| Um Bongo Mango and Apple Congocoction Juice Drink 200ml               | 200 | 10.9 | 21.8 | 5 |
| Sunny D Zingy Orange Berry Juice Drink 500ml                          | 500 | 10.6 | 21.2 | 5 |
| Capri-Sun Juice Drink Tropical 10 x 200ml Pouches                     | 200 | 10.6 | 21.2 | 5 |
| Waitrose Apple & Mango Juice Drink 5 x 250ml                          | 250 | 10.5 | 21.0 | 5 |
| Ribena Blackcurrant 10 x 200ml                                        | 200 | 10.5 | 21.0 | 5 |
| Ribena Raspberry 288ml                                                | 288 | 10.4 | 20.8 | 5 |
| Capri-Sun Apple Juice Drink 10 x 200ml                                | 200 | 10.4 | 20.8 | 5 |
| Waitrose Orange & Passionfruit Fruit Juice Drink 5 x 250ml            | 250 | 10.3 | 20.6 | 5 |
| Sunny D Juicy Orange Passion Juice Drink 5 x 200ml                    | 200 | 10.3 | 20.6 | 5 |
| Capri - Sun Juice Drink Summer Berries 200ml                          | 200 | 10.2 | 20.4 | 5 |
| SunStream Splash Orange Juice Drink 10 x 200ml                        | 200 | 10.2 | 20.4 | 5 |
| SunStream Splash Apple Juice Drink 10 x 200ml                         | 200 | 10.1 | 20.2 | 5 |
| Capri-Sun Apple & Blackcurrant Juice Drink 330ml                      | 330 | 10.0 | 20.0 | 5 |
| Capri-Sun Orange 3 x 330ml                                            | 330 | 10.0 | 20.0 | 5 |
| Robinsons Fruit Shoot Orange 275ml                                    | 275 | 10.0 | 20.0 | 5 |
| Capri-Sun Juice Drink Orange 10 x 200ml Pouches                       | 200 | 10.0 | 20.0 | 5 |
| Um Bongo Orang-Utan Orange Juice Drink 200ml                          | 200 | 10.0 | 20.0 | 5 |
| Ribena Pineapple & Passion Fruit 500ml                                | 500 | 9.9  | 19.8 | 5 |
| Um Bongo Original Congocoction Juice Drink 3 x 200ml                  | 200 | 9.9  | 19.8 | 5 |
| Ribena Apple 500ml                                                    | 500 | 9.8  | 19.6 | 5 |
| Ribena Mango & Lime 500ml                                             | 500 | 9.8  | 19.6 | 5 |
| Don Simon Disney-Pixar Monsters University Tropical Juice Drink 200ml | 200 | 9.8  | 19.6 | 5 |
| Capri - Sun Juice Drink Mango                                         | 200 | 9.6  | 19.2 | 5 |
| Capri-Sun 100% Pure Juice Apple 5 x 200ml Pouches                     | 200 | 9.3  | 18.6 | 5 |

|                                                                             |     |     |      |   |
|-----------------------------------------------------------------------------|-----|-----|------|---|
| Robinsons Fruit Shoot My-5 Apple & Pear 200ml                               | 200 | 9.0 | 18.0 | 5 |
| The Little Crackers Drinks Co Apple and Raspberry Juice Drink 3 x 200ml     | 200 | 8.9 | 17.8 | 4 |
| Sainsbury's Fruit Slurps Tropical Juicy Water 3 x 250ml                     | 250 | 8.7 | 17.4 | 4 |
| Cherrygood Burst 3X200ml                                                    | 200 | 8.6 | 17.2 | 4 |
| Don Simon Disney-Pixar Monsters University Apple & Blackcurrant Juice Drink | 200 | 8.6 | 17.2 | 4 |
| Robinsons Fruit Shoot My-5 Orange & Pineapple 200ml                         | 200 | 8.6 | 17.2 | 4 |
| Sunny D Smooth California Citrus Juice Drink 500ml                          | 500 | 8.5 | 17.0 | 4 |
| Capri-Sun Apple & Cherry Juice Drink 10 x 200ml                             | 200 | 8.4 | 16.8 | 4 |
| Feel Good Kids Juice Drink Orange, Pineapple and Banana 4 x 180ml           | 180 | 8.4 | 16.8 | 4 |
| Ribena Orange 288ml                                                         | 288 | 8.2 | 16.4 | 4 |
| Robinsons Fruit Shoot My-5 Apple & Blackcurrant 200ml                       | 200 | 8.2 | 16.4 | 4 |
| Sunny Delight Florida Style Orange Drink 5 x 200ml                          | 200 | 8.2 | 16.4 | 4 |
| Capri-Sun Fruit Crush Apple & Blackcurrant Juice Drink 5 x 200ml            | 200 | 8.1 | 16.2 | 4 |
| The Little Crackers Drinks Co Orange and Lemon Juice Drink 3 x 200ml        | 200 | 8.1 | 16.2 | 4 |
| Capri-Sun Fruit Crush Tropical 75% Fruit Juice 25% Spring Water             | 200 | 8.0 | 16.0 | 4 |
| 5 Alive Citrus Five Fruit Blend 150ml                                       | 150 | 8.0 | 16.0 | 4 |
| Sainsbury's Fruit Slurps Apple & Mango Juicy Water 3 x 250ml                | 250 | 7.9 | 15.8 | 4 |
| Capri-Sun Fruit Crush Apple & Pear Juice Drink 200ml                        | 200 | 7.9 | 15.8 | 4 |
| The Little Crackers Drinks Co Blackcurrant and Cherry Juice Drink 3 x 200ml | 200 | 7.9 | 15.8 | 4 |
| Sainsbury's Fruit Slurps Apple, Raspberry & Grape Juicy Water 3 x 250ml     | 250 | 7.8 | 15.6 | 4 |
| Tropicana Kids Apple Juice Drink 4 x 200ml                                  | 200 | 7.8 | 15.6 | 4 |
| Tropicana Kids Orange Juice Drink 4 x 200ml                                 | 200 | 7.7 | 15.4 | 4 |
| The Little Crackers Drinks Co Pear and Vanilla Juice Drink 3 x 200ml        | 200 | 7.2 | 14.4 | 4 |
| Feel Good Kids Juice Drink Blackcurrant, Apple & Grape 4 x 180ml            | 180 | 7.2 | 14.4 | 4 |
| I Mune Nurture Orange & Pineapple Water 4X200ml                             | 200 | 7.0 | 14.0 | 4 |
| Cawston Press Kids' Blend Apple & Mango 3 x 200ml                           | 200 | 6.8 | 13.6 | 3 |
| Vimto 500ml                                                                 | 500 | 6.5 | 13.0 | 3 |
| Cawston Press Kids' Blend Apple & Pear 3 x 200ml                            | 200 | 6.4 | 12.8 | 3 |
| Heinz Apple and Blackcurrent Fruity Spring Water                            | 150 | 6.4 | 12.8 | 3 |

|                                                                        |     |     |      |   |
|------------------------------------------------------------------------|-----|-----|------|---|
| 5 Alive Berry Five Fruit Blend Juice Drink 250ml                       | 250 | 6.1 | 12.2 | 3 |
| 5 Alive Tropical Five Fruit Blend Juice Drink 250ml                    | 250 | 6.1 | 12.2 | 3 |
| 5 Alive Apple 150ml                                                    | 150 | 6.1 | 12.2 | 3 |
| Peter Rabbit Organics Organic Pear Juice Drink 150ml                   | 150 | 6.1 | 12.2 | 3 |
| Drench Juicy Spring Water Orange and Passion Fruit 440ml               | 440 | 6.0 | 12.0 | 3 |
| Innocent Apples and Peaches Fruity Water for Kids 180ml                | 180 | 6.0 | 12.0 | 3 |
| Calypso Aqua Juice Apple Juicy Mineral Water 200ml                     | 200 | 5.7 | 11.4 | 3 |
| Calypso Aqua Juice Forest Fruits Juicy Mineral Water 200ml             | 200 | 5.6 | 11.2 | 3 |
| Calypso Aqua Juice Orange Juicy Mineral Water 200ml                    | 200 | 5.4 | 10.8 | 3 |
| Innocent Apples and Mangoes Fruity Water for Kids 180ml                | 180 | 5.0 | 10.0 | 3 |
| Peter Rabbit Organics Organic Juice with Water Summer Berries 250ml    | 250 | 4.7 | 9.4  | 2 |
| Peter Rabbit Organics Organic Juice with Water Orange and Mango 250ml  | 250 | 4.5 | 9.0  | 2 |
| Peter Rabbit Organics Organic Apple and Grape Juice Drink 150ml        | 150 | 4.4 | 8.8  | 2 |
| Peter Rabbit Organics Organic Blackcurrant and Apple Juice Drink 150ml | 150 | 4.2 | 8.4  | 2 |
| Oasis Blackcurrant Apple 500ml                                         | 500 | 4.1 | 8.2  | 2 |
| Oasis Mango Medley 500ml                                               | 500 | 4.1 | 8.2  | 2 |
| Oasis Pineapple Rush 500ml                                             | 500 | 4.1 | 8.2  | 2 |
| Oasis Citrus Punch 375ml                                               | 375 | 4.1 | 8.2  | 2 |
| Oasis Summer Fruits 6 x 375ml                                          | 375 | 4.1 | 8.2  | 2 |
| Rubicon Mango Light 288ml                                              | 288 | 3.8 | 7.6  | 2 |
| Del Monte Fruit Burst Sweet Apple & Blackcurrant 200ml                 | 200 | 1.9 | 3.8  | 1 |
| Moshi Water Strawberry & Raspberry 4X250ml                             | 250 | 1.9 | 3.8  | 1 |
| Moshi Water Blackcurrant 4 X 250ml                                     | 250 | 1.7 | 3.4  | 1 |
| Del Monte Fruit Burst Fruity Pineapple & Raspberry 6 x 200ml           | 200 | 1.7 | 3.4  | 1 |
| Del Monte Fruit Burst Cool Cherry & Luscious Lime 200ml                | 200 | 1.6 | 3.2  | 1 |
| Del Monte Fruit Burst Sour Apple & Strawberry 200ml                    | 200 | 1.6 | 3.2  | 1 |
| Del Monte Fruit Burst Sherbet Lemon Orange & Lime 6 x 200ml            | 200 | 1.3 | 2.6  | 1 |
| Morrisons Nas Apple & Blackcurrant Juice 3 x 250ml                     | 250 | 1.2 | 2.4  | 1 |
| Asda Chosen by Kids Apple & Pear Juice Drink 5 x 200ml                 | 200 | 1.2 | 2.4  | 1 |

|                                                                                |     |     |     |   |
|--------------------------------------------------------------------------------|-----|-----|-----|---|
| Tesco Fruit Splash Orange 4X250ml                                              | 250 | 1.1 | 2.2 | 1 |
| Asda Chosen by Kids Apple & Mango Juice Drink 5 x 200ml                        | 200 | 1.1 | 2.2 | 1 |
| Asda Chosen by Kids Cherries & Berries Juice Drink 5 x 200ml                   | 200 | 1.1 | 2.2 | 1 |
| Asda Chosen by Kids Pineapple & Orange Juice Drink 5 x 200ml                   | 200 | 1.1 | 2.2 | 1 |
| Asda Chosen by Kids No Added Sugar Apple & Blackcurrant Juice Drinks 6 x 300ml | 300 | 1.0 | 2.0 | 1 |
| Robinsons Fruit Shoot Juice Drink Orange 300ml                                 | 300 | 1.0 | 2.0 | 1 |
| Jucee Apple and Blackcurrant Juice Drink 4 x 250ml                             | 250 | 1.0 | 2.0 | 1 |
| Jucee Cherries & Berries Juice Drink 4 x 250ml                                 | 250 | 1.0 | 2.0 | 1 |
| Morrisons No Added Sugar Apple Juice Drink 3 x 250ml                           | 250 | 1.0 | 2.0 | 1 |
| Sainsbury's Fruit Slurps Apple Juice Drink 8 x 250ml                           | 250 | 1.0 | 2.0 | 1 |
| Sainsbury's Fruit Slurps Blackcurrant & Apple Juice Drink 4 x 250ml            | 250 | 1.0 | 2.0 | 1 |
| Tesco Apple & Blackcurrant Juice Drink No Added Sugar 3X250ml                  | 250 | 1.0 | 2.0 | 1 |
| Tesco Apple Juice Drink No Added Sugar 3X250ml                                 | 250 | 1.0 | 2.0 | 1 |
| Tesco Tropical Juice No Added Sugar 3X250ml                                    | 250 | 1.0 | 2.0 | 1 |
| Asda Chosen by Kids Apple & Blackcurrant Juice Drink 5 x 200ml                 | 200 | 1.0 | 2.0 | 1 |
| Ribena Plus Immunity Support No Added Sugar Apple & Peach 10 x 200ml           | 200 | 1.0 | 2.0 | 1 |
| Asda Chosen by Kids No Added Sugar Orange Juice Drinks 6 x 300ml               | 300 | 0.9 | 1.8 | 0 |
| Asda Chosen by Kids No Added Sugar Tropical Juice Drinks 6 x 300ml             | 300 | 0.9 | 1.8 | 0 |
| Jucee No Added Sugar Orange Juice Drink 250ml                                  | 250 | 0.9 | 1.8 | 0 |
| Sainsbury's No Added Sugar Fruit Slurps Orange Juice Drink 4 x 250ml           | 250 | 0.9 | 1.8 | 0 |
| Sainsbury's No Added Sugar Fruit Slurps Summer Fruits Juice Drink 8 x 250ml    | 250 | 0.9 | 1.8 | 0 |
| Ribena Plus Immunity Support No Added Sugar Red Apple 4 x 200ml                | 200 | 0.9 | 1.8 | 0 |
| Ribena Plus Immunity Support No Added Sugar Summer Fruits                      | 200 | 0.9 | 1.8 | 0 |
| Robinsons Fruit Shoot Apple 8 x 200ml                                          | 200 | 0.9 | 1.8 | 0 |
| Asda Chosen by Kids No Added Sugar Summer Fruits Juice Drinks 6 x 300ml        | 300 | 0.8 | 1.6 | 0 |
| Robinsons Fruit Shoot Tropical 275ml                                           | 275 | 0.8 | 1.6 | 0 |
| Robinsons Fruit Shoot Apple & Blackcurrant 15 x 200ml                          | 200 | 0.8 | 1.6 | 0 |
| Robinsons Fruit Shoot Orange 15 x 200ml                                        | 200 | 0.8 | 1.6 | 0 |
| Vimto Cherry No Added Sugar 3 x 250ml                                          | 250 | 0.7 | 1.4 | 0 |

|                                                                                          |     |         |      |   |
|------------------------------------------------------------------------------------------|-----|---------|------|---|
| Robinsons Fruit Shoot Summer Fruits 8 x 200ml                                            | 200 | 0.7     | 1.4  | 0 |
| Oasis Peach Passionfruit Light 500ml                                                     | 500 | 0.6     | 1.2  | 0 |
| Oasis Summer Fruits Light 500ml                                                          | 500 | 0.5     | 1.0  | 0 |
| Ribena No Added Sugar Blackcurrant 288ml                                                 | 288 | 0.5     | 1.0  | 0 |
| Ribena Plus Healthy Bones No Added Sugar Raspberry & Apple 10 x 200ml                    | 200 | 0.5     | 1.0  | 0 |
| Vimto No Added Sugar 500ml                                                               | 500 | 0.4     | 0.8  | 0 |
| Ribena Plus Healthy Bones No Added Sugar Blackcurrant 10 x 200ml                         | 200 | 0.4     | 0.8  | 0 |
| Sainsbury's Basics No Added Sugar Apple Juice Drink 9 x 250ml                            | 250 | 0.3     | 0.6  | 0 |
| Sainsbury's Basics No Added Sugar Orange Juice Drink 9 x 250ml                           | 250 | 0.3     | 0.6  | 0 |
| Vimto Strawberry No Added Sugar 3 x 250ml                                                | 250 | 0.3     | 0.6  | 0 |
| Calypso Cups Disney-Pixar Monsters University Juice Drinks 24 x 185ml                    | 185 | 0.3     | 0.6  | 0 |
| Ribena Plus Apple & Peach 500ml                                                          | 500 | 0.2     | 0.4  | 0 |
| Panda Blackcurrant Still Juice Drink 330ml                                               | 330 | 0.2     | 0.4  | 0 |
| Panda Orange Still Juice Drink 330ml                                                     | 330 | 0.2     | 0.4  | 0 |
| Panda Raspberry Still Juice Drink 6 x 330ml                                              | 330 | 0.2     | 0.4  | 0 |
| Calypso Disney-Pixar Monsters University Apple Juice Drink 3 x 200ml                     | 200 | 0.2     | 0.4  | 0 |
| Calypso Disney Orange Juice Drink 6 x 200ml                                              | 200 | 0.1     | 0.2  | 0 |
| Calypso Disney Princess Blackcurrant Juice Drink 6 x 200ml                               | 200 | 0.1     | 0.2  | 0 |
| Calypso Disney-Pixar Orange Juice Drink 3 x 200ml                                        | 200 | 0.1     | 0.2  | 0 |
| Robinsons Fruit Shoot Mega Hydro Spring Water Drink Apple & Raspberry 4 x 350ml          | 250 | 0.0     | 0.0  | 0 |
| Robinsons Fruit Shoot Hydro Mini Spring Water Drink Blackcurrant 8 x 200ml               | 200 | 0.0     | 0.0  | 0 |
| Robinsons Fruit Shoot Hydro Mini Spring Water Drink Orange & Pineapple 8 x 200ml         | 200 | 0.0     | 0.0  | 0 |
| Asda Chosen by Kids No Added Sugar Cool Cups Orange / Raspberry 24 x 185ml               | 185 | 0.0     | 0.0  | 0 |
| Asda Chosen by Kids No Added Sugar Cool Cups Strawberry, Apple & Blackcurrant 24 x 185ml | 185 | 0.0     | 0.0  | 0 |
| Sainsbury's Eric The Elephant Fruit Cup Drink 12x185ml                                   | 185 | 0.0     | 0.0  | 0 |
|                                                                                          |     | average | 11.1 |   |

| Smoothies                                                                                 |     |         |      |   |
|-------------------------------------------------------------------------------------------|-----|---------|------|---|
| Tesco Goodness Slurper Apple & Banana Fruit Smoothie Snack for kids                       | 90  | 16.1    | 32.2 | 8 |
| Tesco Goodness Slurper Apple & Strawberry Fruit Smoothie Snack for kids                   | 90  | 16.1    | 32.2 | 8 |
| Tesco Goodness Slurper Apple Fruit Smoothie Snacks                                        | 90  | 16.1    | 32.2 | 8 |
| Ella's Kitchen The Yellow One Squished Smoothie Fruits 5 x 90g                            | 90  | 15.1    | 30.2 | 8 |
| Innocent Smoothies for Kids – Apples and Blackcurrants, 6 x 180ml                         | 180 | 14.2    | 28.4 | 7 |
| Ella's Kitchen The Orange One Squished Smoothie Fruits 5 x 90g                            | 90  | 14.2    | 28.4 | 7 |
| Ella's Kitchen The Purple One Squished Smoothie Fruits 5 x 90g                            | 90  | 13.8    | 27.6 | 7 |
| Sainsbury's Smoothie, Apple & Blackcurrant 5x90g                                          | 90  | 13.8    | 27.6 | 7 |
| Don Simon Disney Pixar Cars 2 Tropical Smoothie 3 x 200ml                                 | 200 | 13.7    | 27.4 | 7 |
| Don Simón Don Simon My Little Smoothie Tropical 3 x 200ml                                 | 200 | 13.7    | 27.4 | 7 |
| Ella's Kitchen The Green One Squished Smoothie Fruits 5 x 90g                             | 180 | 13.1    | 26.2 | 7 |
| Innocent Smoothies for Kids Oranges, Mangoes & Pineapples 6 x 180ml                       | 180 | 13.1    | 26.2 | 7 |
| Don Simón Don Simon My Little Smoothie Peach & Passionfruit 3 x 200ml                     | 200 | 13.0    | 26.0 | 7 |
| Happy Monkey Smoothie Strawberry & Banana 4 x 180ml                                       | 180 | 12.7    | 25.4 | 6 |
| Don Simon Disney Princess Strawberry & Raspberry Smoothie 3 x 200ml                       | 200 | 12.6    | 25.2 | 6 |
| Don Simón Don Simon My Little Smoothie Strawberry & Raspberry 3 x 200ml                   | 200 | 12.6    | 25.2 | 6 |
| Happy Monkey Smoothie Orange & Mango 4 x 180ml                                            | 180 | 12.1    | 24.2 | 6 |
| Innocent Smoothies for Kids Cherries and Strawberries 4 x 180ml                           | 180 | 11.5    | 23.0 | 6 |
| Ella's Kitchen The Red One Squished Smoothie Fruits 5 x 90g                               | 90  | 11.5    | 23.0 | 6 |
| Tesco Goodness Slurpers Apple & Blackcurrant Fruit Smoothie Snacks                        | 90  | 11.5    | 23.0 | 6 |
| Tesco Goodness Slurpers Tropical Fruit Smoothie Snacks                                    | 90  | 11.5    | 23.0 | 6 |
| Lake Distict Frumoo Raspberry & Blueberry 230ml                                           | 200 | 10.7    | 21.4 | 5 |
| Innocent 100% Pure Fruit Smoothie For Kids Strawberries, Blackberries & Raspberries 180ml | 180 | 9.5     | 19.0 | 5 |
| The Co-operative Strawberry Smoothie                                                      | 250 | 9.4     | 18.8 | 5 |
|                                                                                           |     | average | 26.0 | 6 |
